# Supplementary material for: Highly efficient photocatalytic degradation over rose-like 1D/2D La(OH)3/(BiO)2OHCl heterostructures boosted by rich oxygen vacancies and enhanced interfacial charge transfer
Source: Royal Society of Chemistry journal article supplement (doi:10.1039/d2en00792d), 2022-12-08
Supplement: d2en00792d1.pdf [file d2en00792d1.pdf]

## Electronic Supporting Information

### Highly efficient photocatalytic degradation over rose-like 1D/2D La(OH)<sub>3</sub>/(BiO)<sub>2</sub>OHCl heterostructures boosted by rich oxygen vacancies and enhanced interfacial charge transfer

Ying Tan<sup>a,‡</sup>, Qin Zhou<sup>a,‡</sup>, Weiya Huang<sup>a,\*</sup>, Kangqiang Lu<sup>a</sup>, Kai Yang<sup>a</sup>, Xunjun Chen<sup>a</sup>, Dan Li<sup>b,\*</sup>,

Dionysios D. Dionysiou<sup>c</sup>

<sup>a</sup> Faculty of Materials, Metallurgical and Chemistry, Jiangxi University of Science and Technology,  
Ganzhou 341000, P. R. China;

<sup>b</sup> College of Science, Health, Engineering and Education, Murdoch University, Murdoch 6150,  
Australia.

<sup>c</sup> Environmental Engineering and Science Program, Department of Chemical and Environmental  
Engineering, University of Cincinnati, Cincinnati, OH 45221-0012, USA

---

\* Corresponding authors:

E-mail address: hweiya@126.com (W.Y. Huang); L.Li@murdoch.edu.au (D. Li)

‡These authors contributed equally to this work.

## Contents

|                                                                                                                                                                                                                                                                           |           |
|---------------------------------------------------------------------------------------------------------------------------------------------------------------------------------------------------------------------------------------------------------------------------|-----------|
| <b>Text S1.</b> Materials.....                                                                                                                                                                                                                                            | <b>4</b>  |
| <b>Text S2.</b> Characterization .....                                                                                                                                                                                                                                    | <b>4</b>  |
| <b>Fig. S1.</b> (a) XRD pattern of BOL-2, (b) magnified XRD patterns of catalysts at $2\theta$ between $25^\circ$ and $28^\circ$ .....                                                                                                                                    | <b>7</b>  |
| <b>Fig. S2.</b> (a, b) SEM images of two BOL-2 microflowers (the arrows point out the growth of $\text{La}(\text{OH})_3$ nanorods on $(\text{BiO})_2\text{OHCl}$ nanosheets), (c-f) elemental mapping of BOL-2, (g) EDS analysis result of BOL-2.....                     | <b>8</b>  |
| <b>Fig. S3.</b> $\text{N}_2$ adsorption-desorption isotherms of $(\text{BiO})_2\text{OHCl}$ and BOL-x (x = 1, 2, 3 and 4) (a) and $\text{La}(\text{OH})_3$ (b); Pore size distribution of $(\text{BiO})_2\text{OHCl}$ and BOL-x (c) and $\text{La}(\text{OH})_3$ (d)..... | <b>9</b>  |
| <b>Fig. S4.</b> (a) XPS survey spectrum and (b) high-resolution XPS spectrum of Cl 2p for BOL-2; (c) XPS survey spectrum and (d) high-resolution XPS spectrum of Cl 2p for $(\text{BiO})_2\text{OHCl}$ ; (e) XPS survey spectrum for $\text{La}(\text{OH})_3$ . .....     | <b>10</b> |
| <b>Fig. S5.</b> (a) EPR spectra, (b) UV-Vis DRS, (c) EIS plots, (d) TC removal efficiencies of BOL-2 and m-BOL-2.....                                                                                                                                                     | <b>11</b> |
| <b>Fig. S6.</b> TC (a) and o-NP (b) removal by adsorption in the dark.....                                                                                                                                                                                                | <b>11</b> |
| <b>Fig. S7.</b> TC removal by adsorption in the dark and photocatalytic degradation under visible light with (a) $C_0 = 100 \text{ mg/L}$ ; (b) $C_0 = 5 \text{ mg/L}$ .....                                                                                              | <b>12</b> |
| <b>Fig. S8.</b> HPLC-MS spectra of intermediates in the photocatalytic degradation of TC using BOL-2.....                                                                                                                                                                 | <b>13</b> |
| <b>Fig. S9.</b> Surface photovoltage (SPV) spectra of BOL-2 and $(\text{BiO})_2\text{OHCl}$ .....                                                                                                                                                                         | <b>18</b> |
| <b>Fig. S10.</b> Effect of different trapping agents on the photocatalytic degradation of TC by using pristine $(\text{BiO})_2\text{OHCl}$ (a) over different periods of reaction time and (b) after 100 min reaction. ....                                               | <b>18</b> |

|                                                                                                                                                                           |           |
|---------------------------------------------------------------------------------------------------------------------------------------------------------------------------|-----------|
| <b>Table S1.</b> Band gap values of $(\text{BiO})_2\text{OHCl}$ , $\text{La}(\text{OH})_3$ and BOL-x (x = 1, 2, 3 and 4).                                                 | <b>19</b> |
| <b>Table S2.</b> Information of antibiotic removal by BOL-2 and various bismuth-based catalysts from other studies.....                                                   | <b>19</b> |
| <b>Table S3.</b> Pseudo-first-order rate constants and correlation coefficients ( $R^2$ ) for photocatalytic degradation of TC and o-NP over the as-prepared samples..... | <b>20</b> |
| <b>Table S4.</b> Charge carrier lifetime parameters of $(\text{BiO})_2\text{OHCl}$ Cl and BOL-2 .....                                                                     | <b>20</b> |
| <b>References</b> .....                                                                                                                                                   | <b>21</b> |

## **Text S1. Materials**

$\text{Bi}(\text{NO}_3)_3 \cdot 5\text{H}_2\text{O}$  (99%),  $\text{La}(\text{NO}_3)_3 \cdot 6\text{H}_2\text{O}$  (99.9%) and  $\text{NH}_3 \cdot \text{H}_2\text{O}$  (25 - 28%) were purchased from Aladdin Industrial Corporation (Shanghai, China). Ethanol and KCl were purchased from Sinopharm Chemical Reagent Corporation (Shanghai, China). All chemicals and reagents were used without further purification.

## **Text S2. Characterization**

The X-ray diffraction (XRD) spectra were recorded using the Bruker D8-Advance X-ray powder diffraction instrument with Cu K $\alpha$  radiation ( $\lambda = 0.15418$  nm). The morphology and surface composition structure were characterized by a scanning electron microscope (SEM, FEI Quanta 250) and a transmission electron microscope (TEM, FEI Tecnai G<sup>2</sup> 20). The chemical compositions were analyzed by an X-ray photoelectron spectroscope (XPS, Thermo Scientific K-Alpha). The specific surface areas were measured by a nitrogen adsorption analyzer (Micromeritics ASAP 2020). The Fourier transform infrared (FT-IR) spectra were recorded on a Nicolet 5700 FT-IR spectrometer. The UV-Vis diffuse reflectance spectra (DRS) were recorded with a UV-Vis spectrophotometer (Shimadzu UV-2600) in the range of 200 – 800 nm. The electron spin resonance (ESR) spectra were recorded on an electron spin resonance spectrometer (Bruker A300) with 5,5-dimethyl-1-pyrroline N-oxide (DMPO: 50 mM, 0.2 mL). The surface photovoltage spectroscopy (SPV, Zhongjiao jinyuan, CEL-SPEC) was used to measure the photovoltaic response. The intermediate products of TC were analyzed by a high-performance liquid chromatograph-tandem mass spectrometer (HPLC-MS,

ThermoFisher Q-Exactive). The electrochemical measurements of samples were performed on an electrochemical workstation with a standard three-electrode system (Shanghai Chenhua, CHI 660D) and a 400-nm LED lamp (Silver Bead Technology, Zhenjiang, China) as the light source.

The concentrations of TC and o-NP in solutions were monitored by measuring their maximum absorbance on a UV–vis spectrophotometer (UV-8000, Shanghai Metsch Instrument Co., Ltd.), based on the maximum absorption wavelength of 357 nm or 270 nm, respectively. The removal efficiency can be obtained by using the Eq. (S1) <sup>[1]</sup>:

$$\text{Removal efficiency} = (1 - C/C_0) \times 100\% \quad (\text{S1})$$

The photocatalytic degradation kinetics of TC and o-NP were further analyzed by using the pseudo-first-order reaction kinetic equation, shown as Eq. (S2) <sup>[2]</sup>:

$$\ln (C/C_0) = -kt \quad (\text{S2})$$

where  $C_0$  and  $C$  is the initial and residual concentration (mg/L) of TC and o-NP in solution, respectively.

Total organic carbon contents (TOC) were tested by total organic carbon analyzer (vario-TOC). The TOC removal % can be obtained using the Eq. (S3):

$$\text{TOC removal efficiency} = (1 - \text{TOC}/\text{TOC}_0) \times 100\% \quad (\text{S3})$$

where  $\text{TOC}_0$  and  $\text{TOC}$  is initial and residual TOC in solution, respectively.

The time-resolved fluorescence emission decay spectra data were obtained using the steady state and transient state fluorescence spectrometer (Edinburgh UK, FLS980).

The results were calculated by using the Eq. (S4) [3]:

$$\tau = \frac{A_1\tau_1^2 + A_2\tau_2^2 + A_3\tau_3^2}{A_1\tau_1 + A_2\tau_2 + A_3\tau_3} \quad (\text{S4})$$

where  $\tau$  is the average lifetime,  $\tau_1 \sim \tau_3$  is the respective decay lifetime, and  $A_1 \sim A_3$  is the corresponding weight factor.

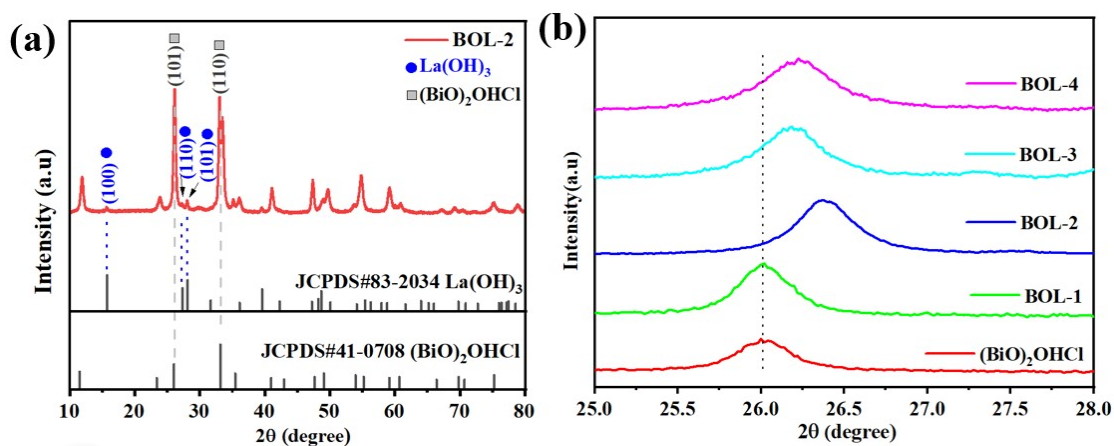

**Fig. S1.** (a) XRD pattern of BOL-2, (b) Magnified XRD patterns of catalysts at 2θ between 25° and 28°.

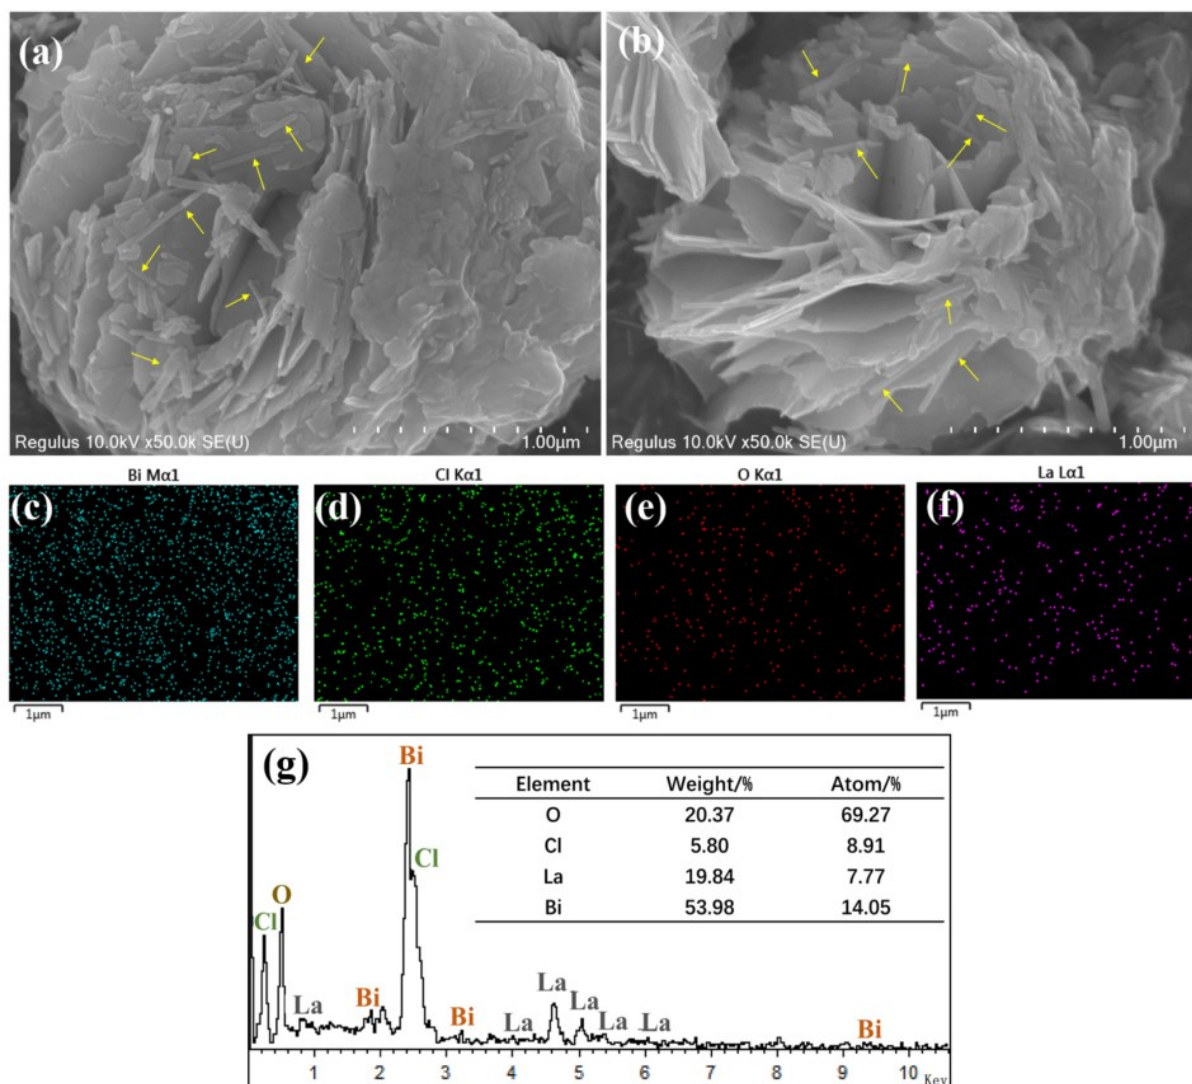

**Fig. S2.** (a, b) SEM images of two BOL-2 microflowers (the arrows point out the

growth of  $\text{La}(\text{OH})_3$  nanorods on  $(\text{BiO})_2\text{OHCl}$  nanosheets), (c-f) elemental mapping of BOL-2, (g) EDS analysis result of BOL-2.

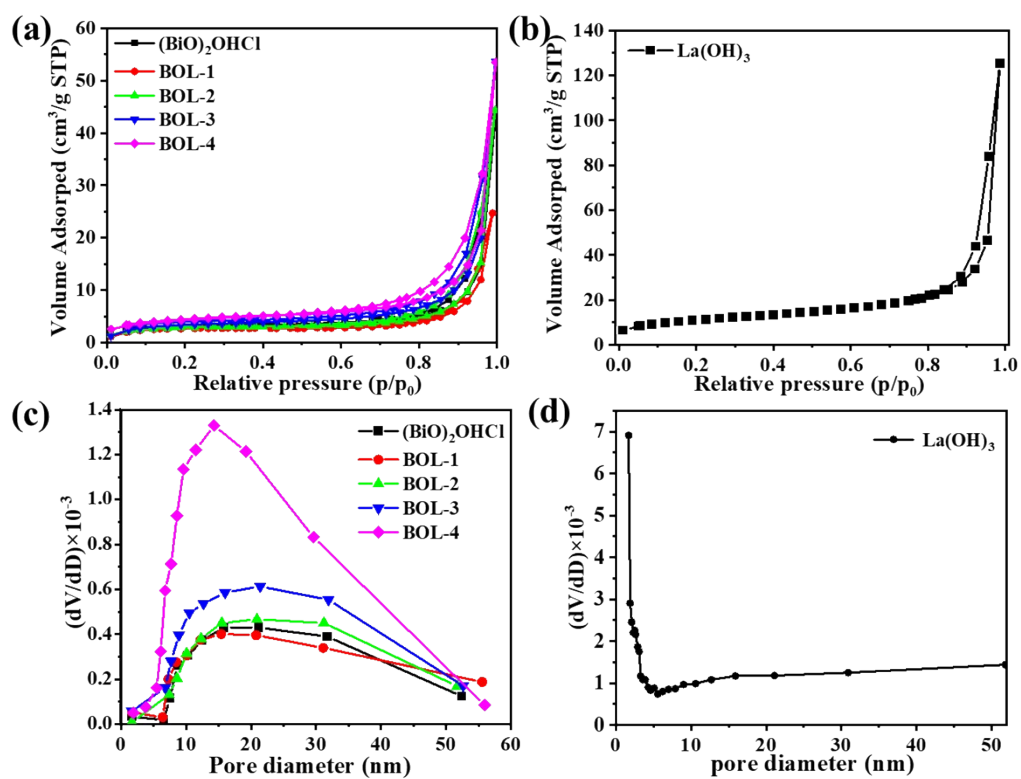

**Fig. S3.**  $\text{N}_2$  adsorption-desorption isotherms of  $(\text{BiO})_2\text{OHCl}$  and BOL- $x$  ( $x = 1, 2, 3$  and 4) (a) and  $\text{La}(\text{OH})_3$  (b), Pore size distribution of  $(\text{BiO})_2\text{OHCl}$  and BOL- $x$  (c) and  $\text{La}(\text{OH})_3$  (d).



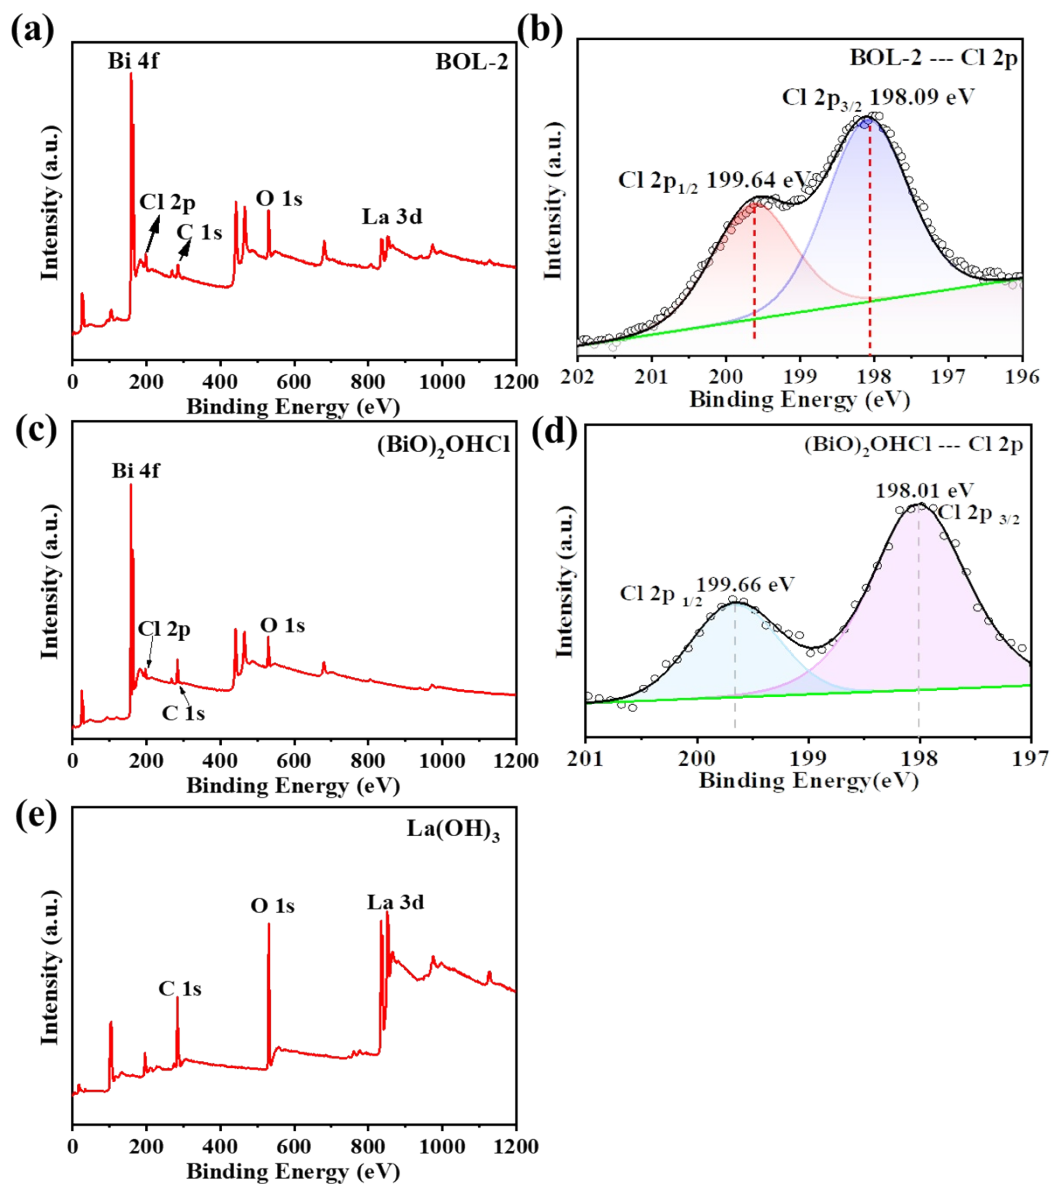

**Fig. S4.** (a) XPS survey spectrum and (b) high-resolution XPS spectrum of Cl 2p for BOL-2; (c) XPS survey spectrum and (d) high-resolution XPS spectrum of Cl 2p for  $(\text{BiO})_2\text{OHCl}$ ; (e) XPS survey spectrum for  $\text{La}(\text{OH})_3$ .

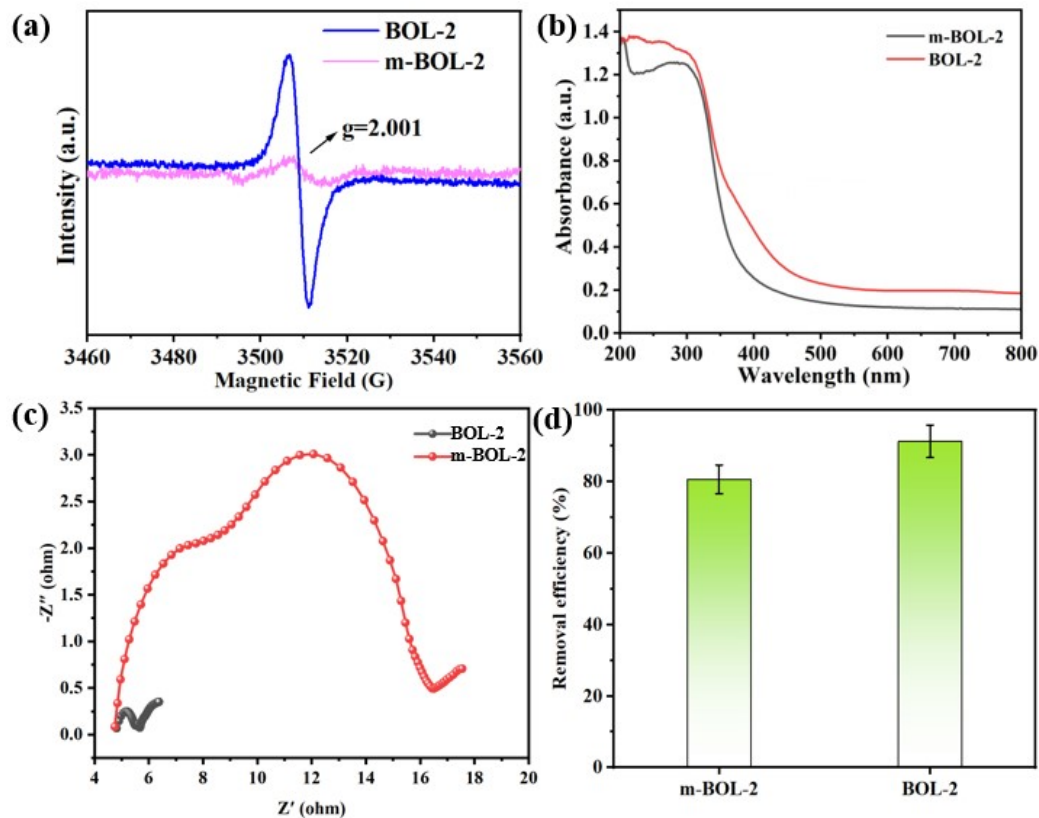

**Fig. S5.** (a) EPR spectra, (b) UV-Vis DRS, (c) EIS plots, (d) TC removal efficiencies of BOL-2 and m-BOL-2.

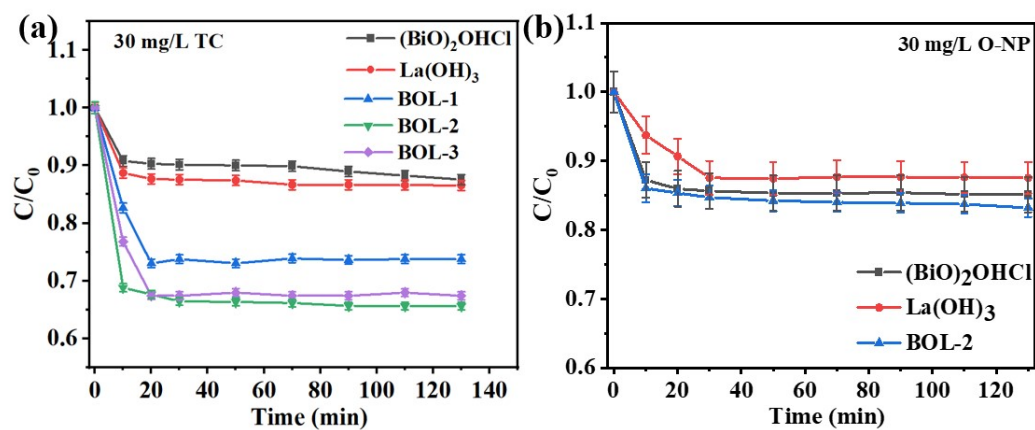

**Fig. S6.** TC (a) and o-NP (b) removal by adsorption in the dark.

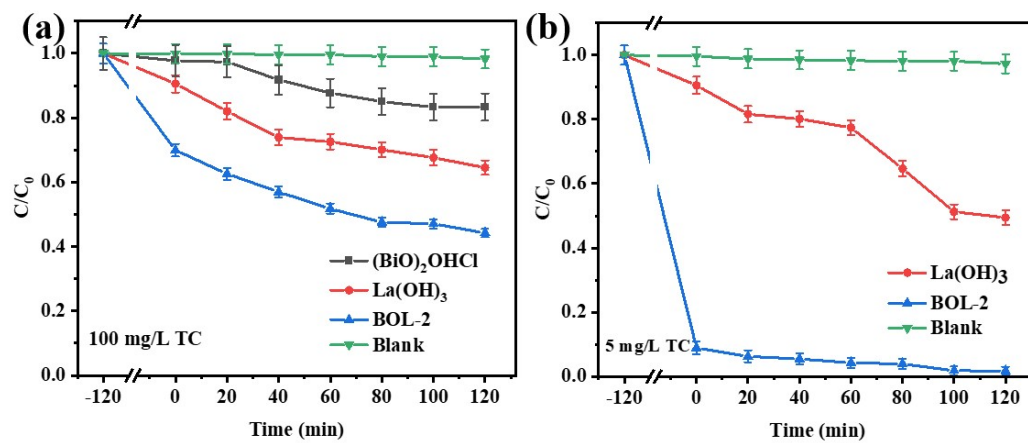

**Fig. S7.** TC removal, by adsorption in the dark and photocatalytic degradation under visible light, from the solution with (a)  $C_0 = 100$  mg/L; (b)  $C_0 = 5$  mg/L.

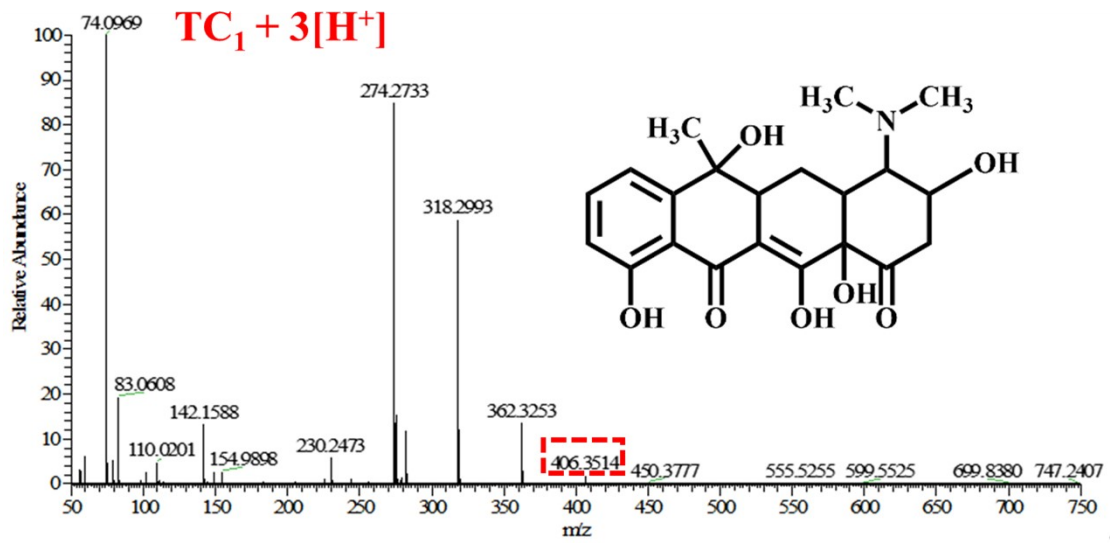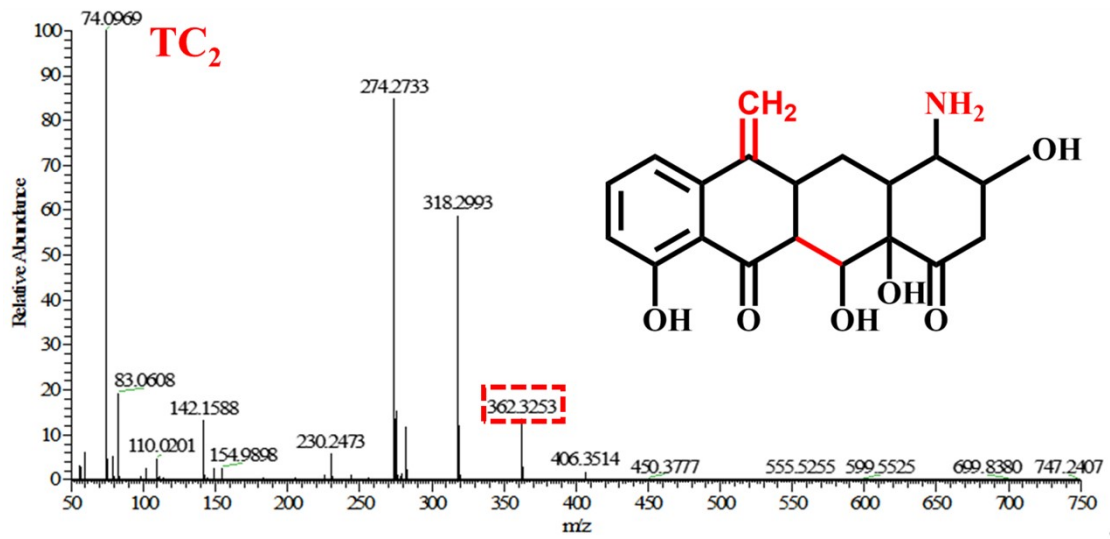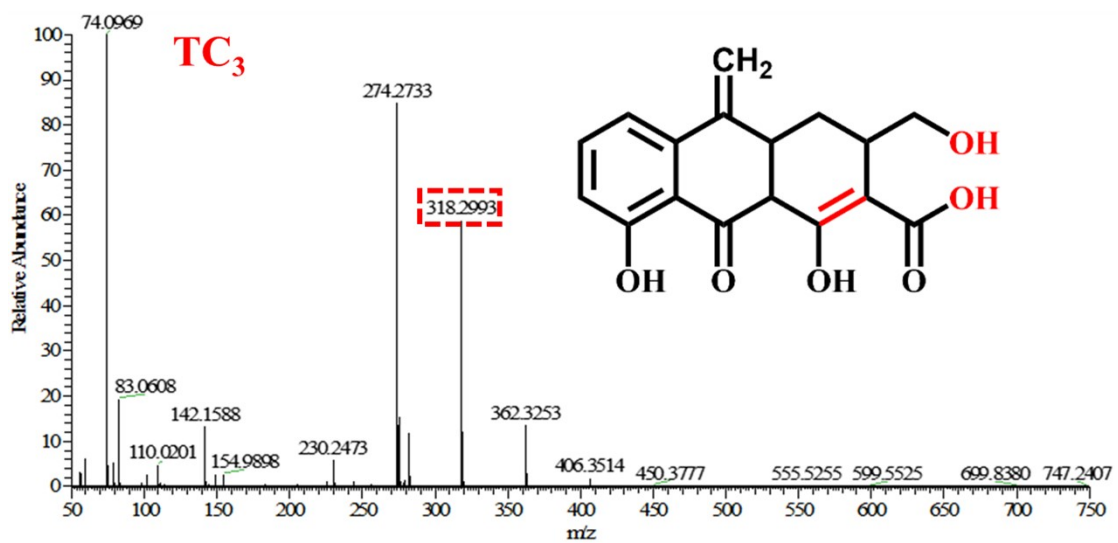

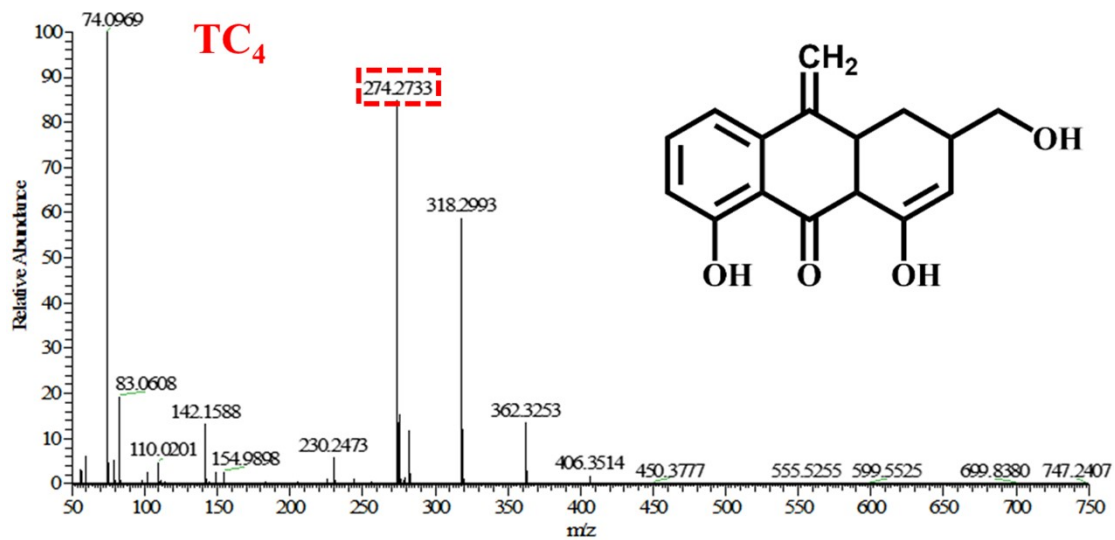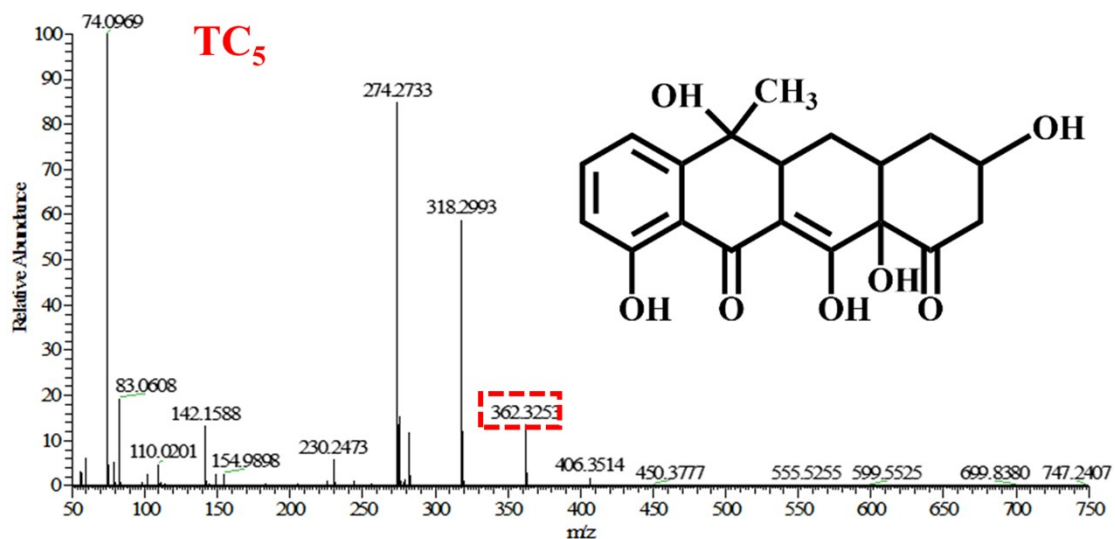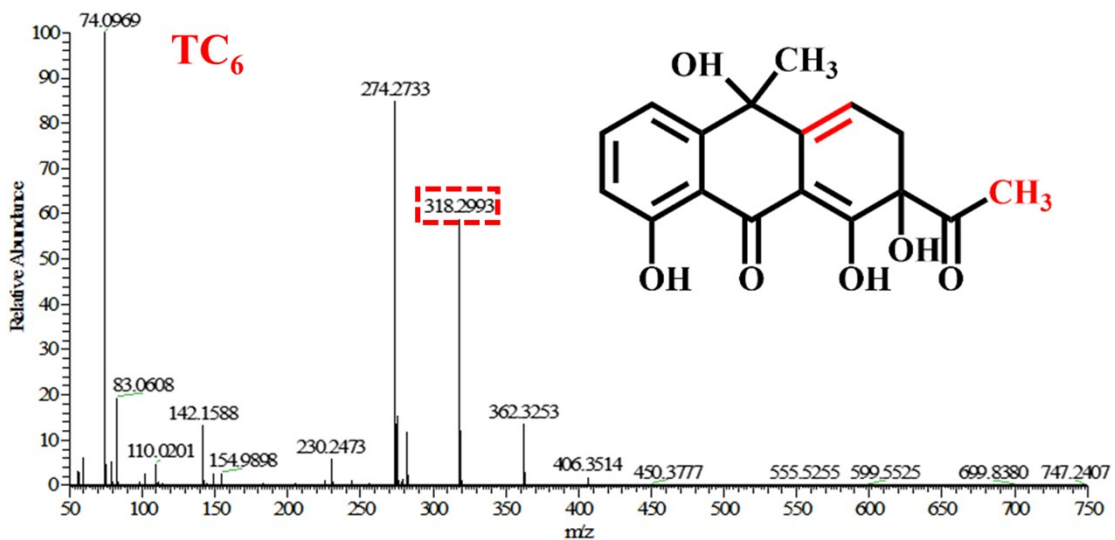

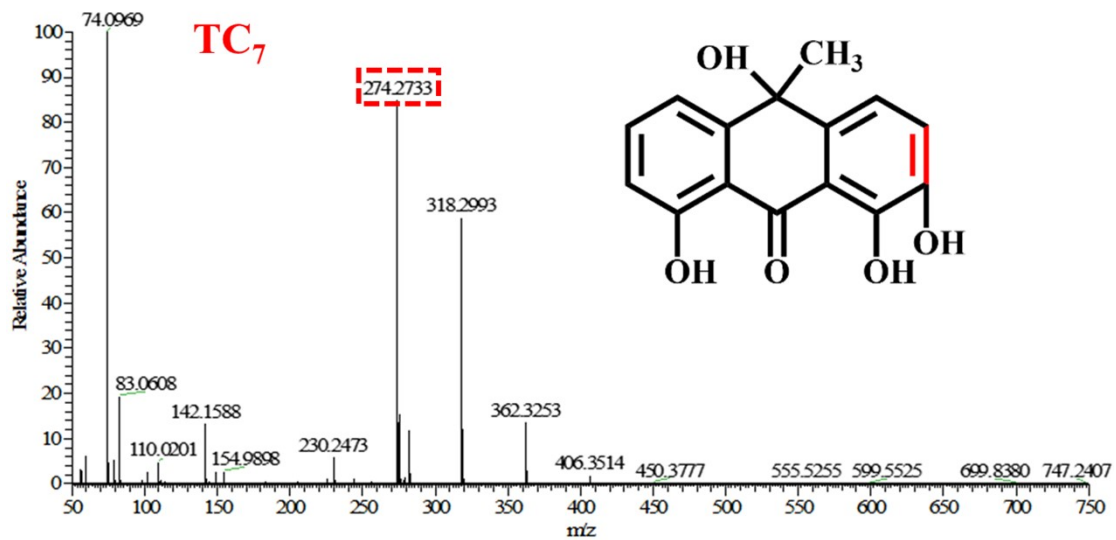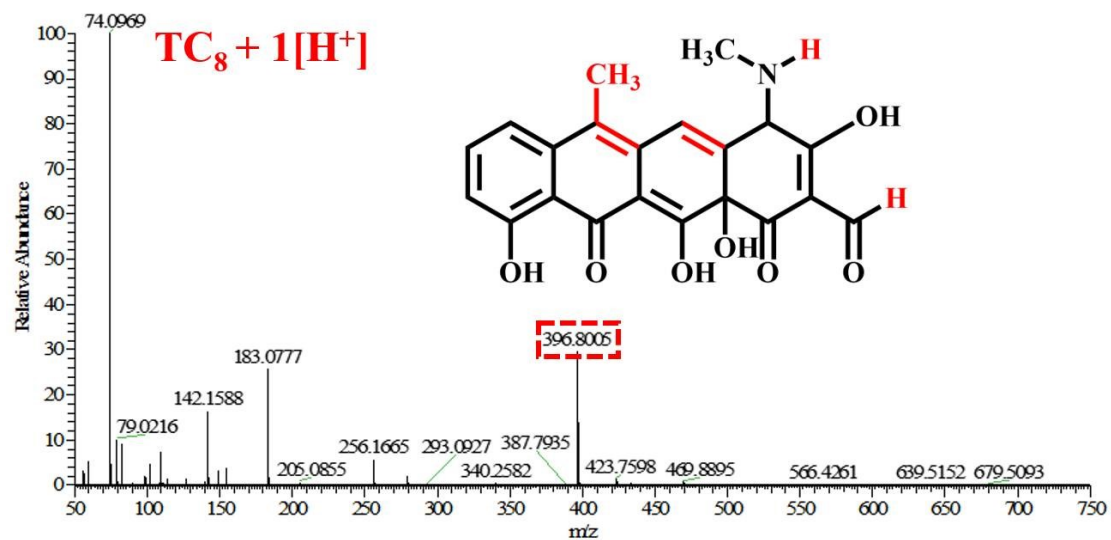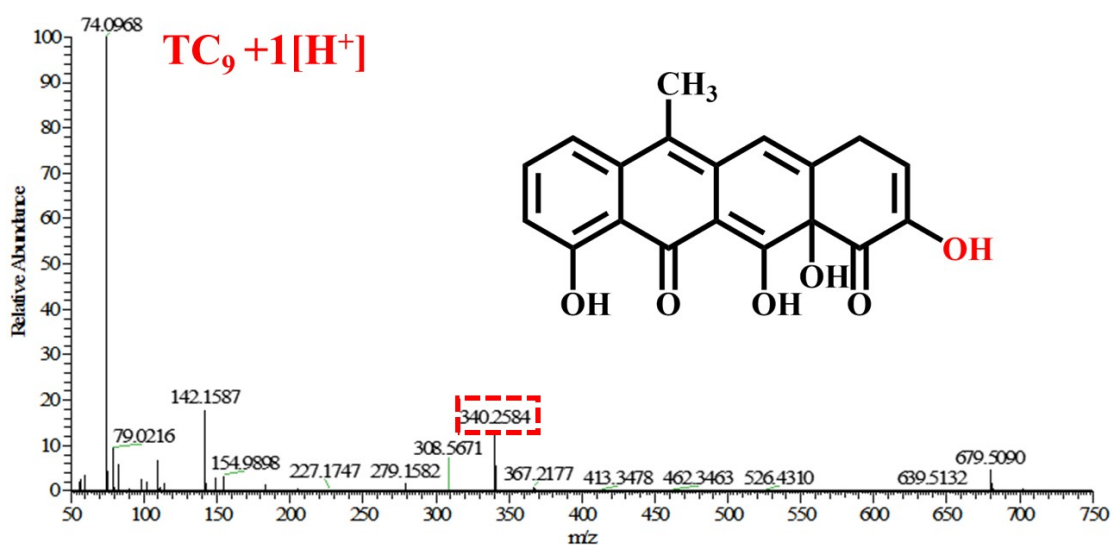

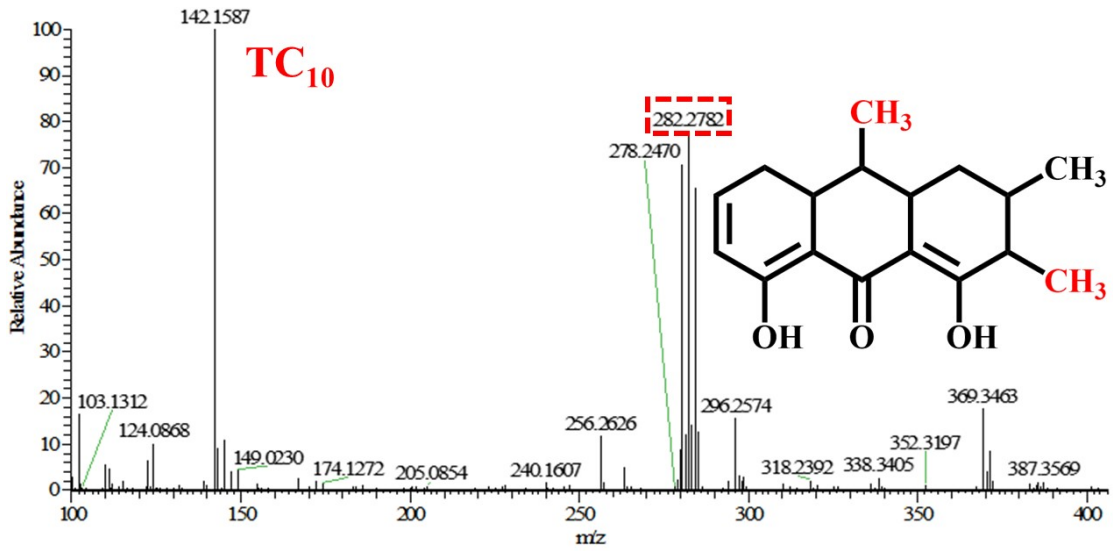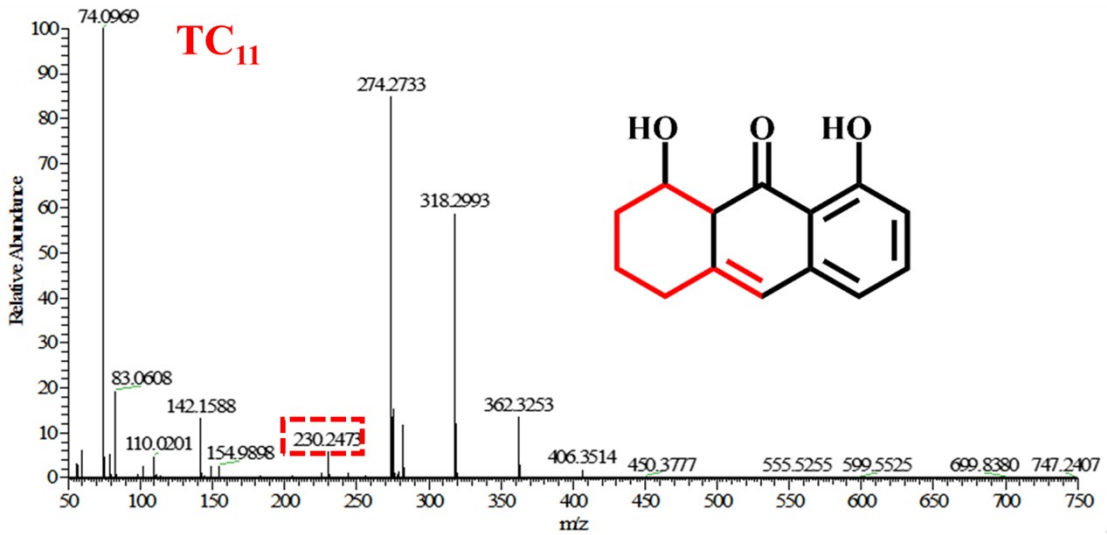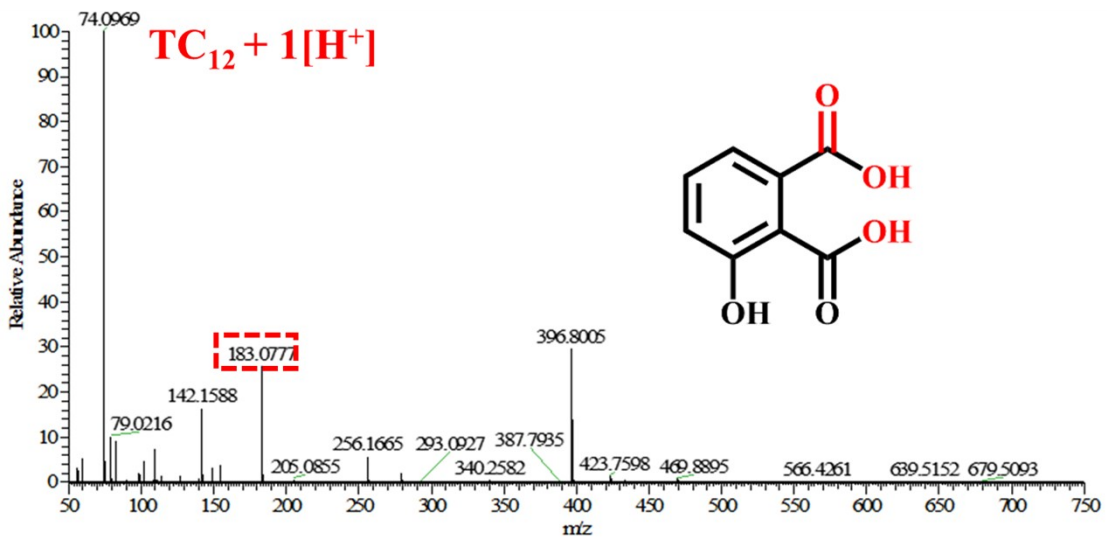

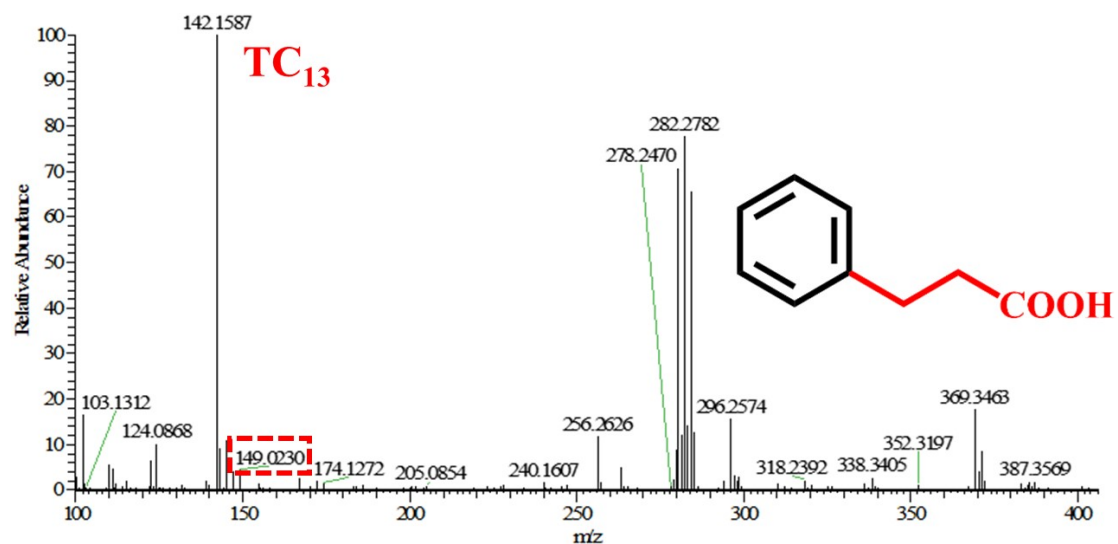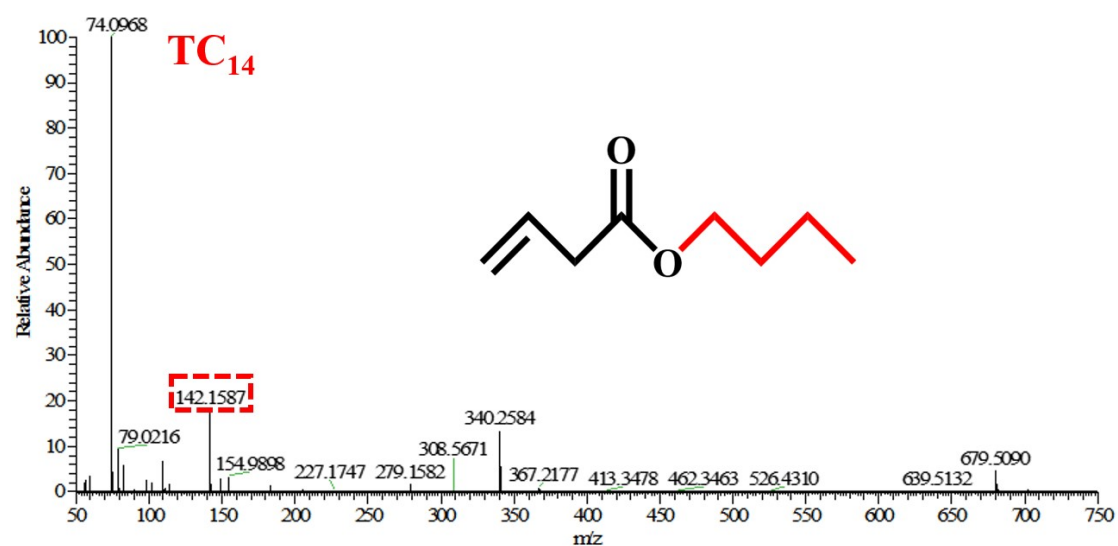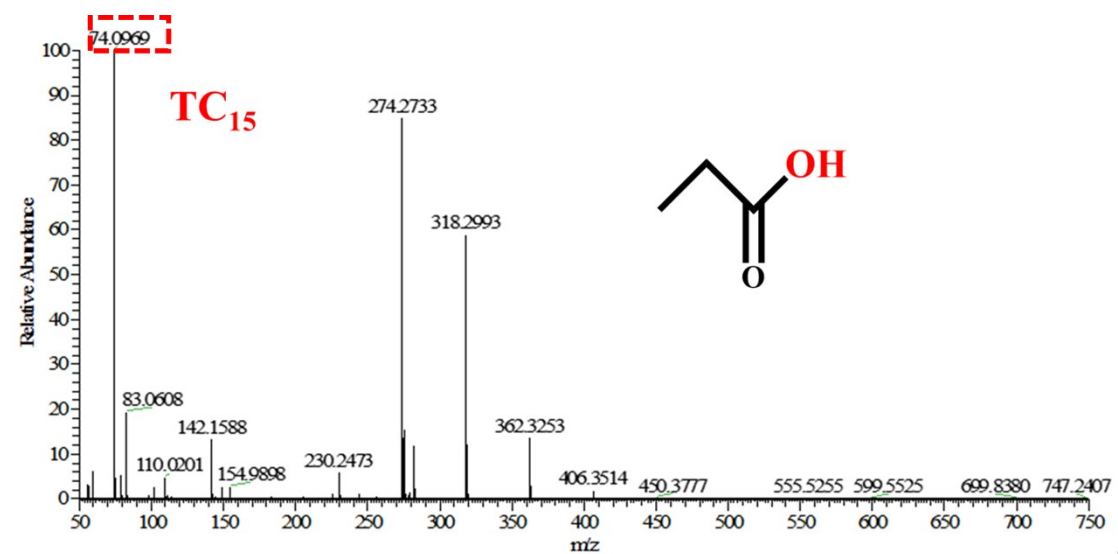

**Fig. S8.** HPLC-MS spectra of intermediates in the photocatalytic degradation of TC



using BOL-2.

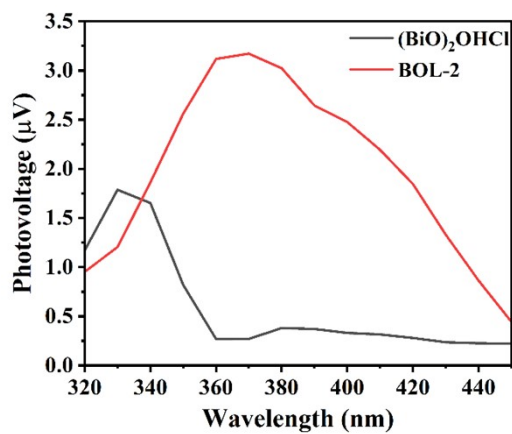

**Fig. S9.** Surface photovoltage (SPV) spectra of BOL-2 and (BiO)<sub>2</sub>OHCl.

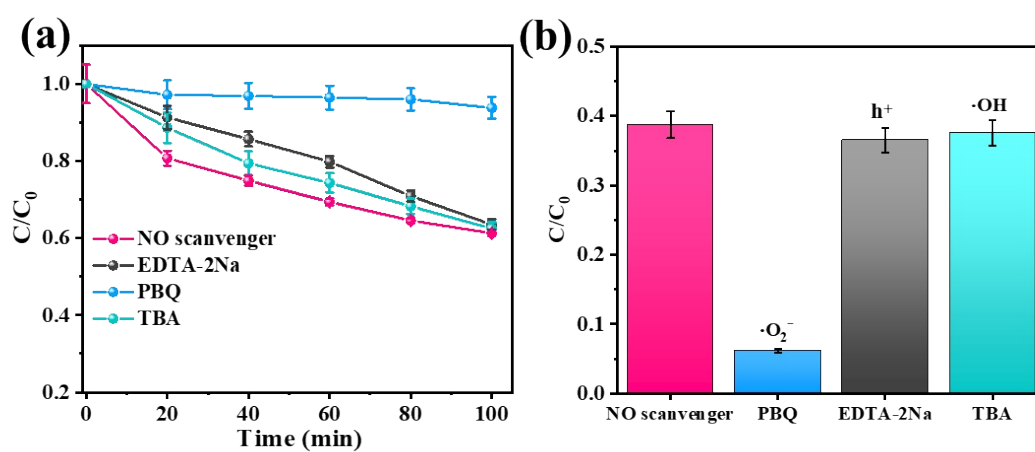

**Fig. S10.** Effect of different trapping agents on the photocatalytic degradation of TC by using pristine (BiO)<sub>2</sub>OHCl (a) over different periods of reaction time and (b) after 100 min reaction.

**Table S1.** Band gap values of (BiO)<sub>2</sub>OHCl, La(OH)<sub>3</sub> and BOL-x (x = 1, 2, 3 and 4).

| Sample              | (BiO) <sub>2</sub> OHCl | La(OH) <sub>3</sub> | BOL-1 | BOL-2 | BOL-3 | BOL-4 |
|---------------------|-------------------------|---------------------|-------|-------|-------|-------|
| band gap value (eV) | 3.04                    | 2.95                | 2.18  | 2.51  | 2.92  | 3.12  |

**Table S2.** Information of antibiotic removal by BOL-2 and various bismuth-based

| Photocatalyst (dosage)                                                                      | Light source                             | antibiotics      | Concentration (mg/L) | Removal % | Reference |
|---------------------------------------------------------------------------------------------|------------------------------------------|------------------|----------------------|-----------|-----------|
| BOL-2<br>(50 mg/80 mL)                                                                      | LED lamp<br>(λ = 420 nm)                 | TC <sup>a</sup>  | 30                   | 91.3%     | This work |
|                                                                                             |                                          |                  | 10                   | 96.7%     |           |
|                                                                                             |                                          |                  | 5                    | 98.3%     |           |
| m-BOL-2<br>(50 mg/80 mL)                                                                    | LED lamp<br>(λ = 420 nm)                 | TC <sup>a</sup>  | 30                   | 80.6%     | This work |
| La(OH) <sub>3</sub> /BiOCl<br>(25 mg/50 mL)                                                 | LED light<br>(λ ≥ 420 nm, 5 W)           | TC <sup>a</sup>  | 20                   | 85.0%     | [4]       |
| La(OH) <sub>3</sub> /BaTiO <sub>3</sub><br>(100 mg/100 mL)                                  | 350 W Xe lamp                            | TC <sup>a</sup>  | 10                   | ~100.0%   | [5]       |
| Bi <sub>2</sub> O <sub>2</sub> (OH) <sub>x</sub> Cl <sub>2-x</sub><br>(50 mg/100 mL)        | LED lamp<br>(λ ≥ 420 nm, 50 W)           | CIP <sup>b</sup> | 20                   | ~90.0%    | [6]       |
| (BiO) <sub>2</sub> OHCl@Bi <sub>24</sub> O <sub>31</sub> Cl <sub>10</sub><br>(10 mg/100 mL) | 500 W metal halogen lamp<br>(λ ≥ 420 nm) | LEV <sup>c</sup> | 10                   | 90.0%     | [7]       |

catalysts from other studies.

<sup>a</sup>Tetracycline hydrochloride, <sup>b</sup>Ciprofloxacin, <sup>c</sup>levofloxacin

**Table S3.** Pseudo-first-order rate constants and correlation coefficients ( $R^2$ ) for photocatalytic degradation of TC and o-NP over the as-prepared samples.

| Sample                  | TC                        |        | o-NP                      |        |
|-------------------------|---------------------------|--------|---------------------------|--------|
|                         | $k$ ( $\text{min}^{-1}$ ) | $R^2$  | $k$ ( $\text{min}^{-1}$ ) | $R^2$  |
| Blank                   | 0.0001                    | 0.9332 | 0.0001                    | 0.9417 |
| (BiO) <sub>2</sub> OHCl | 0.0048                    | 0.9569 | 0.0037                    | 0.9538 |
| La(OH) <sub>3</sub>     | 0.0063                    | 0.9953 | 0.0094                    | 0.9963 |
| BOL-1                   | 0.0087                    | 0.9899 | 0.0061                    | 0.9366 |
| BOL-2                   | 0.0169                    | 0.9670 | 0.0235                    | 0.9560 |
| BOL-3                   | 0.0100                    | 0.9978 | 0.0168                    | 0.9612 |
| BOL-4                   | 0.0075                    | 0.9872 | 0.0107                    | 0.9962 |

**Table S4.** Charge carrier lifetime parameters of (BiO)<sub>2</sub>OHCl and BOL-2.

| Sample□                 | $\tau_1$ | $\tau_2$ | $\tau_3$ | $A_1$  | $A_2$  | $A_3$  | $\tau/\text{ns}$ |
|-------------------------|----------|----------|----------|--------|--------|--------|------------------|
| (BiO) <sub>2</sub> OHCl | 1.9174   | 1.9173   | 1.9172   | 68.261 | 67.962 | 67.033 | 1.9173           |
| BOL-2                   | 2.2512   | 2.2511   | 2.2510   | 74.088 | 74.636 | 72.287 | 2.2511           |
| La(OH) <sub>3</sub>     | 0.9437   | 0.9436   | 0.9436   | 76.213 | 76.322 | 70.397 | 0.9436           |

## References

- [1] J. A. Jonidi, B K.akavandi, N. Jaafarzadeh, K. R. Rezaei, Ahmadi M, Akbar Babaei A. Fenton-like catalytic oxidation of tetracycline by AC@Fe<sub>3</sub>O<sub>4</sub> as a heterogeneous persulfate activator: Adsorption and degradation studies, *J. Ind. Eng. Chem.*, 2017, **45**, 323-333.
- [2] C. Xu, Q.Zhou, W.Y. Huang, K. Yang, Y. C. Zhang, T.X. Liang, Constructing Z-scheme  $\beta$ -Bi<sub>2</sub>O<sub>3</sub>/ZrO<sub>2</sub> heterojunctions with 3D mesoporous SiO<sub>2</sub> nanospheres for efficient antibiotic remediation via synergistic adsorption and photocatalysis, *Rare Metals.*, 2022, **41**, 2094-2107.
- [3] D. Xiang, X .Hao, Z. Jin. Cu/CdS/MnOx Nanostructure-Based Photocatalyst for Photocatalytic Hydrogen Evolution, *ACS Appl. Nano Mater.*, 2021, **4**, 13848-13860.
- [4] Z. Zhou, H. Xu, D. Li, Z. Zou, D. Xia. Microwave-assisted synthesis of La(OH)<sub>3</sub>/BiOCl n-n heterojunctions with high oxygen vacancies and its enhanced photocatalytic properties, *Chem. Phys. Lett.*, 2019, **736**, 136805.
- [5] B.Wang, K. Wei, F. Chen, Y. Wang, G. He, W. Li, J. Liu, Q. He. Effects of active species on degrading A-ring of tetracycline in the Z-scheme heterostructured core-shell La(OH)<sub>3</sub>@BaTiO<sub>3</sub> composition, *J. Alloys Compd.*, 2019, **804**, 100-110.
- [6] X. Wu, K. Li, Y. Li, G. Zhang, Motivating visible light photocatalytic activity of ultrathin Bi<sub>2</sub>O<sub>2</sub>(OH)<sub>x</sub>Cl<sub>2-x</sub> solid solution with exposed {001} facets by the co-effect of oxygen vacancy and OH replacement, *Nanoscale.*, 2018, **10**, 15294-15302.
- [7] C. Sun, R. Li, Y. Zhao, R. Yang, H. Xu, Ammonia-dependent synthesis of (BiO)<sub>2</sub>OHCl@Bi<sub>24</sub>O<sub>31</sub>Cl<sub>10</sub> heterostructures with enhanced visible-light induced photocatalytic activities on levofloxacin removal, *J. Alloys Compd.*, 2022, **901**, 163647.
